# Supplementary material for: Evaluation of Cellular Responses of Heterotrophic Escherichia coli Cultured with Autotrophic Chlamydomonas reinhardtii as a Nutrient Source by Analyses Based on Microbiology and Transcriptome
Source: MDPI journal article supplement (doi:10.3390/microorganisms12030452), 2024-02-23
Supplement: s1 [file s1]

Supplemental Data  
Supplemental Figure S1

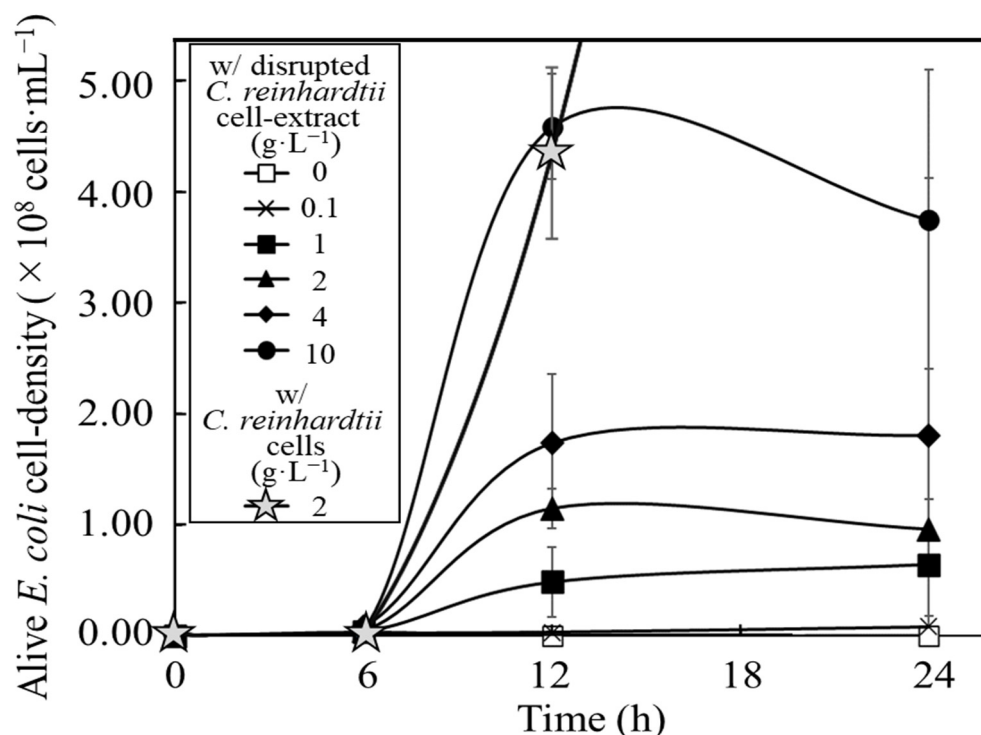

**Supplemental Figure S1** Complementation of growth of *E. coli* in *C. reinhardtii*-MBBM with those in disrupted cell-extract-MBBM.

Those *E. coli* growth was compared using data depending on Figure 1 (a) and Figure 2 (a).

Growth activities of *E. coli* were shown in MBBM containing 0 (□), 0.1 (×), 1 (■), 2 (▲), 4 (◆) and 10 g·L<sup>-1</sup> (●) of disrupted cell-extracts from *C. reinhardtii*, and in MBBM containing 2 g·L<sup>-1</sup> (☆) of *C. reinhardtii* cells. Error bars indicate the SD of three replicate experiments (n = 3).

**Supplemental Table S1.** Primer pairs used on qPCR

| Category   | Enzyme name [EC number]                                     | Abbreviation | Forward/Reverse | Sequence alignment   |
|------------|-------------------------------------------------------------|--------------|-----------------|----------------------|
| Glycolysis | glucokinase [EC:2.7.1.2]                                    | glk          | F               | agcggtcattcggttatc   |
|            |                                                             |              | R               | gtcaccggtaattgggca   |
|            | glucose-1-phosphatase [EC:3.1.3.10]                         | agp          | F               | atctgaccagcagtggaa   |
|            |                                                             |              | R               | ataactgaccagcggttc   |
|            | glucose-1-phosphatase [EC:3.1.3.10]                         | yihX         | F               | gttttcacccagcgatacg  |
|            |                                                             |              | R               | aaatagtcgggatgggtg   |
|            | phosphoglucomutase [EC:5.4.2.2]                             | pgm          | F               | gcttctattggcggtctgaa |
|            |                                                             |              | R               | ccgttctttctcaatctgc  |
|            | glucose PTS system EIICB or EIICBA component [EC:2.7.1.199] | ptsG         | F               | tcttactggcggttgctg   |
|            |                                                             |              | R               | aatgccaacgcaacta     |

|                                                                                   |      |   |                           |
|-----------------------------------------------------------------------------------|------|---|---------------------------|
| maltose/glucose PTS system EIICB component [EC:2.7.1.199; 2.7.1.208]              | malX | F | attaccgctctgcgtttgtc      |
|                                                                                   |      | R | actgaacttgaggcccgat<br>a  |
| sugar PTS system EIIA component [EC:2.7.1.-]                                      | crr  | F | agacggcaccattggtaa<br>aa  |
|                                                                                   |      | R | cgataccgaagtggacga<br>ac  |
| galactose-1-epimerase<br>aldose 1-epimerase [EC:5.1.3.3]                          | galM | F | gccctgagttcagatgatg<br>g  |
|                                                                                   |      | R | ggcgcgataagtaatgga<br>ga  |
| putative sulfoquinovose mutarotase YihR<br>aldose 1-epimerase [EC:5.1.3.3]        | yihR | F | acggctatccgtttatgctg      |
|                                                                                   |      | R | agtgcgcatattctggcttg      |
| putative aldose 1-epimerase YeaD<br>glucose-6-phosphate 1-epimerase [EC:5.1.3.15] | yeaD | F | tcgaacaaatctccctgtc       |
|                                                                                   |      | R | gaggctttacctggggat<br>g   |
| glucose-6-phosphate isomerase [EC:5.3.1.9]                                        | pgi  | F | caatacccgatttggttg        |
|                                                                                   |      | R | tcaccggaataatcgctt<br>c   |
| fructose 1,6-bisphosphatase YggF<br>fructose-1,6-bisphosphatase II [EC:3.1.3.11]  | yggF | F | tatcggcgaaggagaaat<br>tg  |
|                                                                                   |      | R | gtgccttcaatgggatcaa<br>c  |
| fructose-1,6-bisphosphatase 2<br>fructose-1,6-bisphosphatase II [EC:3.1.3.11]     | glpX | F | tcgtcattggtgaaggtga<br>a  |
|                                                                                   |      | R | gtgccttcaatcggatcaa<br>c  |
| fructose-1,6-bisphosphatase 1<br>fructose-1,6-bisphosphatase I [EC:3.1.3.11]      | fbp  | F | tctggatatcatcccgga<br>a   |
|                                                                                   |      | R | agcggttcgacatcttcaac      |
| 6-phosphofructokinase 2 [EC:2.7.1.11]                                             | pfkB | F | aactcagtgcgctggtga<br>at  |
|                                                                                   |      | R | tgccgctattaacgatttc       |
| 6-phosphofructokinase 1 [EC:2.7.1.11]                                             | pfkA | F | aattcagccgtgaagacct<br>g  |
|                                                                                   |      | R | tttcacgaccggtttcttc       |
| fructose-bisphosphate aldolase, class I [EC:4.1.2.13]                             | fbaB | F | ttgctgctaaccgctctac       |
|                                                                                   |      | R | cgtaagttgacgccacaca<br>g  |
| fructose-bisphosphate aldolase, class II [EC:4.1.2.13]                            | fbaA | F | aatcgcatgactctggaa<br>a   |
|                                                                                   |      | R | gtacagtgacagaagcgtc<br>ca |
| triose-phosphate isomerase<br>triosephosphate isomerase (TIM) [EC:5.3.1.1]        | tpiA | F | tgacgctaacatcgctgaa<br>c  |
|                                                                                   |      | R | atatccggctgagcaaac<br>ag  |
| glyceraldehyde-3-phosphate dehydrogenase A<br>glyceraldehyde 3-phosphate          | gapA | F | agttgacctgaccgttcgtc      |
|                                                                                   |      | R | acgtcatcttcggtgtagcc      |

dehydrogenase (phosphorylating)  
[EC:1.2.1.12]

|                                                                                                    |      |   |                                 |
|----------------------------------------------------------------------------------------------------|------|---|---------------------------------|
| phosphoglycerate kinase [EC:2.7.2.3]                                                               | pgk  | F | acgaagctgacctgggtg              |
|                                                                                                    |      | R | ac<br>ttgctacgcgaacatcaga<br>c  |
| 2,3-bisphosphoglycerate-dependent<br>phosphoglycerate mutase [EC:5.4.2.11]                         | gpmA | F | aaaagtatggcgacgagc              |
|                                                                                                    |      | R | ag<br>gtcagcggcagttcttctc       |
| putative phosphatase<br>2,3-bisphosphoglycerate-dependent<br>phosphoglycerate mutase [EC:5.4.2.11] | ytjC | F | cggctgtgacatcatcttg             |
|                                                                                                    |      | R | cgacgccagttcttcttc              |
| 2,3-bisphosphoglycerate-independent<br>phosphoglycerate mutase [EC:5.4.2.12]                       | gpmM | F | ttgggatcgcgtagaaaa              |
|                                                                                                    |      | R | ag<br>ataagcagcctgcaaacc<br>ag  |
| enolase [EC:4.2.1.11]                                                                              | eno  | F | gcgaaactgaagacgcta              |
|                                                                                                    |      | R | cc<br>acggtcagaacggctcat<br>ag  |
| phosphoenolpyruvate carboxykinase<br>(ATP) [EC:4.1.1.49]                                           | pck  | F | caaacgtctgttcgtgtcg             |
|                                                                                                    |      | R | aacctgccagttcttcatcg            |
| pyruvate kinase I [EC:2.7.1.40]                                                                    | pykF | F | caccgtactgggtgacgat             |
|                                                                                                    |      | R | g<br>ggcaggttcacaccttgtt        |
| pyruvate kinase II [EC:2.7.1.40]                                                                   | pykA | F | acatcatcctgcctctgac             |
|                                                                                                    |      | R | tgattaccgctcggtttagc            |
| pyruvate-ferredoxin/flavodoxin<br>oxidoreductase [EC:1.2.7.1; 1.2.7.-]                             | ydbK | F | gtggtacgcacagggcta              |
|                                                                                                    |      | R | tt<br>caaaatcagcctgggaaa<br>tg  |
| phosphoenolpyruvate synthetase<br>pyruvate, water dikinase [EC:2.7.9.2]                            | ppsA | F | aacggatgaaagacggt               |
|                                                                                                    |      | R | gag<br>attccagcaactccgcata<br>g |
| acetyl-CoA synthetase (AMP-forming)<br>[EC:6.2.1.1]                                                | acs  | F | ggcgcatattgattccaac             |
|                                                                                                    |      | R | gtgacgttcgggttttcag             |
| pyruvate dehydrogenase E2 component<br>(dihydrolipoamide acetyltransferase)<br>[EC:2.3.1.12]       | aceF | F | tgctgaaaacgacgcttat             |
|                                                                                                    |      | R | g<br>cgcaggatacgcacctttac<br>g  |
| pyruvate dehydrogenase E1 component<br>[EC:1.2.4.1]                                                | aceE | F | actgggtactgatggcttc             |
|                                                                                                    |      | R | g<br>atcgatttcgccagtttag        |
| lipoamide dehydrogenase<br>dihydrolipoamide dehydrogenase<br>[EC:1.8.1.4]                          | lpd  | F | tcaccaagcgtatcagcaa             |
|                                                                                                    |      | R | g<br>tgccttccatcgtcacataa       |
| aldehyde dehydrogenase B [EC:1.2.1.-]                                                              | aldB | F | taccccgcttctgtactgc             |
|                                                                                                    |      | R | ttcgaggctgccagatatt<br>c        |
|                                                                                                    | adhE | F | cctgactctgggtgtggtt             |

|                                                                                                |      |   |                      |
|------------------------------------------------------------------------------------------------|------|---|----------------------|
| acetaldehyde dehydrogenase / alcohol dehydrogenase [EC:1.2.1.10; 1.1.1.1]                      |      | R | ctcgcttagcaacggttttc |
| ethanol dehydrogenase/alcohol dehydrogenase [EC:1.1.1.1]                                       | adhP | F | ggatatccacgtcttgctg  |
|                                                                                                |      | R | ttcggcaccactttaccttc |
|                                                                                                |      | F | ttttaccgagcaggaagtg  |
| malate dehydrogenase [EC:1.1.1.37]                                                             | mdh  | R | g                    |
|                                                                                                |      | R | tgcacgaaccagagacag   |
|                                                                                                |      |   | ac                   |
| quinone oxidoreductase                                                                         |      | F | agtgtctggggttgaactac |
| malate dehydrogenase (quinone) [EC:1.1.5.4]                                                    | mgo  | R | g                    |
|                                                                                                |      | R | tccgccacttcttttgaac  |
| citrate synthase [EC:2.3.3.1]                                                                  | gltA | F | atgattctttccgcctgatg |
|                                                                                                |      | R | cccagctctttcagcacttc |
|                                                                                                |      | F | aagtgcgtaaccacgaaa   |
| aconitate hydratase 2 / 2-methylisocitrate dehydratase [EC:4.2.1.3 4.2.1.99]                   | acnB | R | cc                   |
|                                                                                                |      | R | cagcacgcacttcatcaat  |
|                                                                                                |      |   | c                    |
| putative hydratase YbhJ                                                                        |      | F | aaaatggctgcctgaaag   |
| aconitate hydratase [EC:4.2.1.3]                                                               | ybhJ | R | tg                   |
|                                                                                                |      | R | gtaaactgccagcgagaa   |
|                                                                                                |      |   | gg                   |
|                                                                                                |      | F | tatctcggcaaagcagtg   |
| aconitate hydratase 1 [EC:4.2.1.3]                                                             | acnA | R | g                    |
|                                                                                                |      | R | tgcgagtcagtagcaacg   |
|                                                                                                |      |   | ag                   |
|                                                                                                |      | F | cccgtggctgaaagttaa   |
| isocitrate dehydrogenase [EC:1.1.1.42]                                                         | icd  | R | a                    |
|                                                                                                |      | R | aggatctgttcaggaat    |
|                                                                                                |      |   | gc                   |
| 2-oxoglutarate dehydrogenase E1 component [EC:1.2.4.2]                                         | sucA | F | cttacctctctggcgcaaac |
|                                                                                                |      | R | accaggtactgtctggaa   |
|                                                                                                |      |   | cg                   |
| dihydrolipoyltranssuccinylase                                                                  |      | F | tggctgctgactcgtgaa   |
| 2-oxoglutarate dehydrogenase E2 component (dihydrolipoamide succinyltransferase) [EC:2.3.1.61] | sucB | R | g                    |
|                                                                                                |      | R | gtcatcgggacacgttttc  |
| succinyl-CoA synthetase beta subunit [EC:6.2.1.5]                                              | sucC | F | ggtccgtgggtagtgaag   |
|                                                                                                |      | R | tg                   |
|                                                                                                |      | R | gcacggatgtcttctttgct |
|                                                                                                |      | F | tgctgaccgtgaaagtga   |
| succinyl-CoA synthetase alpha subunit [EC:6.2.1.5]                                             | sucD | R | ag                   |
|                                                                                                |      | R | cggttgtgaatgtgacca   |
|                                                                                                |      |   | g                    |
| succinate:quinone oxidoreductase, membrane protein SdhC                                        |      | F | cgggtgtgatcaccttgttg |
| succinate dehydrogenase / fumarate reductase, cytochrome b subunit [EC:1.3.5.1]                | sdhC | R | aagcttgctcgaaaccttc  |
|                                                                                                |      |   | a                    |
| succinate:quinone oxidoreductase, membrane protein SdhD                                        | sdhD | F | cgtctgacgctctacatca  |
| succinate dehydrogenase / fumarate                                                             |      | R | atagaaaacagcgccagc   |
|                                                                                                |      |   | ag                   |

|                                                    |                                                                                                |      |   |                           |
|----------------------------------------------------|------------------------------------------------------------------------------------------------|------|---|---------------------------|
| reductase, membrane anchor subunit<br>[EC:1.3.5.1] |                                                                                                |      |   |                           |
| Pentose<br>phosphate<br>pathway                    | succinate:quinone oxidoreductase, FAD<br>binding protein                                       |      | F | ggtcttcgtaaggtgat<br>g    |
|                                                    | succinate dehydrogenase / fumarate<br>reductase, flavoprotein subunit [EC:1.3.5.1;<br>1.3.5.4] | sdhA | R | tgttgaaactcgctggaagt<br>g |
|                                                    | succinate:quinone oxidoreductase, iron-<br>sulfur cluster binding protein                      |      | F | aaaactcgacgggctgtat<br>g  |
|                                                    | succinate dehydrogenase / fumarate<br>reductase, iron-sulfur subunit [EC:1.3.5.1;<br>1.3.5.4]  | sdhB | R | acgatatgccgctaaca<br>gc   |
|                                                    | fumarate reductase membrane protein<br>FrdD                                                    | frdD | F | cttcattggtcgctattcc       |
|                                                    | fumarate reductase subunit D                                                                   |      | R | agcagccagaccgtagaa<br>aa  |
|                                                    | fumarate reductase membrane protein<br>FrdC                                                    | frdC | F | gtttgaactggcaccgaaa<br>g  |
|                                                    | fumarate reductase subunit C                                                                   |      | R | gggcaacaacaggatta<br>cg   |
|                                                    | fumarate reductase iron-sulfur protein                                                         |      | F | gtatggcgatttgtggtcc       |
|                                                    | fumarate reductase iron-sulfur subunit<br>[EC:1.3.5.4]                                         | frdB | R | acgcttaacctcataccg        |
|                                                    | fumarate reductase flavoprotein subunit<br>[EC:1.3.5.4]                                        | frdA | F | cgaatgaccaactgga<br>ac    |
|                                                    |                                                                                                |      | R | tatggaagccggtcttatc<br>g  |
|                                                    | fumarase C                                                                                     |      | F | cattacctgtgcaccgtttg      |
|                                                    | fumarate hydratase, class II [EC:4.2.1.2]                                                      | fumC | R | ggacatcattggcgatttc       |
|                                                    | fumarase A                                                                                     |      | F | ggggatctggatcgaaaa<br>ac  |
|                                                    | fumarate hydratase, class I [EC:4.2.1.2]                                                       | fumA | R | aaacgggatactgcgaca<br>ac  |
|                                                    | fumarase D                                                                                     |      | F | tgggaaatcgacaaaag<br>ag   |
|                                                    | fumarate hydratase D [EC:4.2.1.2]                                                              | fumD | R | cgctgcgataacaatatg<br>c   |
|                                                    | fumarase E                                                                                     |      | F | tgtgcttgagcaactggat<br>g  |
|                                                    | fumarate hydratase E [EC:4.2.1.2]                                                              | fumE | R | acggcttcactgcatttcc       |
|                                                    | fumarase B                                                                                     |      | F | ccggtatccactcgttgtc       |
|                                                    | fumarate hydratase, class I [EC:4.2.1.2]                                                       | fumB | R | gaagttcttaccggcgctc<br>a  |
| Pentose<br>phosphate<br>pathway                    | quinoprotein glucose dehydrogenase<br>[EC:1.1.5.2]                                             | gcd  | F | actgtggcagggctgttta<br>c  |
|                                                    | glyoxylate reductase                                                                           |      | R | tagtcgcccatcttcgtacc      |
|                                                    | glyoxylate/hydroxypyruvate/2-<br>ketogluconate reductase [EC:1.1.1.79;<br>1.1.1.81; 1.1.1.215] | ghrB | F | atttcgttgcctgatcctg       |
|                                                    |                                                                                                |      | R | cagtgcattttcgtcaacca      |
|                                                    | D-gluconate kinase, thermostable<br>gluconokinase [EC:2.7.1.12]                                | gntK | F | ttcttgatggcgatttctc       |
|                                                    |                                                                                                |      | R | tagtgcgctgcatagcaaa<br>c  |

|                                                                                                                   |      |   |                                                  |
|-------------------------------------------------------------------------------------------------------------------|------|---|--------------------------------------------------|
| D-gluconate kinase, thermosensitive<br>gluconokinase [EC:2.7.1.12]                                                | idnK | F | ctggctggaacgcttaaat<br>g                         |
|                                                                                                                   |      | R | cgccatctaaccagagga<br>aa                         |
| 2-dehydro-3-deoxygluconokinase<br>[EC:2.7.1.45]                                                                   | kdgK | F | tactactggcggaacgaa<br>gc                         |
|                                                                                                                   |      | R | taatcgaaattcgccagct<br>c                         |
| NADP(+)-dependent glucose-6-phosphate<br>dehydrogenase                                                            | zwf  | F | cgctgtaaatgctgccttc                              |
| glucose-6-phosphate 1-dehydrogenase<br>[EC:1.1.1.49; 1.1.1.363]                                                   |      | R | tatgccgctttatcccagtc                             |
| 6-phosphogluconolactonase [EC:3.1.1.31]                                                                           | pgl  | F | atccgcacggtaatatcga<br>a                         |
|                                                                                                                   |      | R | cgtataaatggcgaccatc<br>c                         |
| phosphogluconate dehydratase<br>[EC:4.2.1.12]                                                                     | edd  | F | cgattgtgtcgttgtgtcc<br>ggagagtcgtccatcggt<br>aa  |
| KHG/KDPG aldolase                                                                                                 | eda  | F | agaagtgcctgaagcgat<br>tg                         |
| 2-dehydro-3-deoxyphosphogluconate<br>aldolase / (4S)-4-hydroxy-2-oxoglutarate<br>aldolase [EC:4.1.2.14; 4.1.3.42] |      | R | ccttcggtagcagctttcag                             |
| 6-phosphogluconate dehydrogenase,<br>decarboxylating                                                              | gnd  | F | agatcggcgtagtcggtat<br>g                         |
| 6-phosphogluconate dehydrogenase<br>[EC:1.1.1.44 1.1.1.343]                                                       |      | R | tttcggcaatcacttcttc                              |
| transketolase 2                                                                                                   | tktB | F | tacgccggatcaggttaaa<br>g                         |
| transketolase [EC:2.2.1.1]                                                                                        |      | R | gctaatttctctgccgcttg                             |
| transketolase 1                                                                                                   | tktA | F | acggctccatgctgatcta<br>c                         |
| transketolase [EC:2.2.1.1]                                                                                        |      | R | gcagctgacggaagtttt<br>c                          |
| ribulose-phosphate 3-epimerase<br>[EC:5.1.3.1]                                                                    | rpe  | F | aagtacgtcgccgtatcga<br>c                         |
|                                                                                                                   |      | R | gtctggctgggtgaagatt<br>g                         |
| ribose 5-phosphate isomerase A<br>[EC:5.3.1.6]                                                                    | rpiA | F | ctgtattgcagacgcttcca<br>ctacgtgcatcgggataa<br>c  |
| allose-6-phosphate isomerase/ribose-5-<br>phosphate isomerase B                                                   | rpiB | F | gtactggcgtcggtatttc<br>g                         |
| ribose 5-phosphate isomerase B<br>[EC:5.3.1.6]                                                                    |      | R | accactcgtgaacaaaa<br>gc                          |
| transaldolase B                                                                                                   | talB | F | gggcgtggtttctgtatctg<br>agaatttcgccgatgttac<br>g |
| transaldolase [EC:2.2.1.2]                                                                                        |      | R |                                                  |
| transaldolase A [EC:2.2.1.2]                                                                                      | talA | F | agttgatgcacgcctctctt<br>atttctcaacgccttgttgc     |
|                                                                                                                   |      | R |                                                  |

|                         |                                                                                        |      |   |                       |
|-------------------------|----------------------------------------------------------------------------------------|------|---|-----------------------|
| Fatty acid biosyntheses | ribokinase [EC:2.7.1.15]                                                               | rbsK | F | aaagctcaccggtattcgtg  |
|                         |                                                                                        |      | R | ccattcacgctagcccatac  |
|                         | putative mutase YhfW<br>phosphopentomutase [EC:5.4.2.7]                                | yhfW | F | cgcgatttggtgtagtg     |
|                         |                                                                                        |      | R | aactggctcaggatgtgacc  |
|                         | phosphopentomutase [EC:5.4.2.7]                                                        | deoB | F | attgctgccatgaagaaac   |
|                         |                                                                                        |      | R | tggagttaccggctttgtc   |
|                         | ribose-phosphate pyrophosphokinase<br>[EC:2.7.6.1]                                     | prs  | F | ttgtggtttctccgacatc   |
|                         |                                                                                        |      | R | catcacctgtgaaacgttcg  |
|                         | ribose 1,5-bisphosphokinase [EC:2.7.4.23]                                              | phnN | F | aggattgccatacgtcaac   |
|                         |                                                                                        |      | R | caggcatggtgtttctcctt  |
|                         | deoxyribose-phosphate aldolase<br>[EC:4.1.2.4]                                         | deoC | F | cggtaaccaacttcccacac  |
|                         |                                                                                        |      | R | caggtaaaaaccaacctgct  |
|                         | acetyl-CoA carboxyltransferase subunit<br>alpha                                        |      | F | ccgtcaggatgagaaactgg  |
|                         | acetyl-CoA carboxylase carboxyl<br>transferase subunit alpha [EC:6.4.1.2;<br>2.1.3.15] | accA | R | atcggcgaagattttacgtg  |
|                         | acetyl-CoA carboxyltransferase subunit<br>beta                                         |      | F | aagcactgatgtcgctgatg  |
|                         | acetyl-CoA carboxylase carboxyl<br>transferase subunit beta [EC:6.4.1.2;<br>2.1.3.15]  | accD | R | atggcgaaactgcagaaac   |
|                         | biotin carboxyl carrier protein                                                        |      | F | aaagtcaacgtgggcgat    |
|                         | acetyl-CoA carboxylase biotin carboxyl<br>carrier protein                              | accB | R | ctttcacgggtaccggatttg |
|                         | biotin carboxylase                                                                     |      | F | tatctgaacatcccggaat   |
|                         | acetyl-CoA carboxylase, biotin carboxylase<br>subunit [EC:6.4.1.2; 6.3.4.14]           | accC | R | tcgggccaatgaagataaag  |
|                         | [acyl-carrier-protein] S-malonyltransferase<br>[EC:2.3.1.39]                           | fabD | F | tattgcgaaagcgtgtgaa   |
|                         |                                                                                        |      | R | cgctcaaccgcttctttatg  |
|                         | 3-oxoacyl-[acyl-carrier-protein] synthase III<br>[EC:2.3.1.180]                        | fabH | F | cgcagctgtcagattcaaa   |
|                         |                                                                                        |      | R | aaccgacgaccagagcat    |
|                         | 3-oxoacyl-[acyl-carrier-protein] synthase I<br>[EC:2.3.1.41]                           | fabB | F | ctctgatggtgcagacatg   |
|                         |                                                                                        |      | R | cgtagggagttcaggaatcg  |
|                         |                                                                                        | fabF | F | aactcgtcggctttggtatg  |

|                           |                                                                                                                                                                           |      |   |                           |
|---------------------------|---------------------------------------------------------------------------------------------------------------------------------------------------------------------------|------|---|---------------------------|
| Fatty acid<br>degradation | 3-oxoacyl-[acyl-carrier-protein] synthase II<br>[EC:2.3.1.179]                                                                                                            |      | R | cgcgtaacgtagccaatc<br>t   |
|                           | 3-oxoacyl-[acyl-carrier protein] reductase<br>[EC:1.1.1.100]                                                                                                              | fabG | F | ccgtctgtcaaagcggtg<br>a   |
|                           |                                                                                                                                                                           |      | R | ttcccatggtaccaaccac       |
|                           | beta-hydroxyacyl-acyl carrier protein<br>dehydratase/isomerase                                                                                                            |      | F | cgaacatgctgatgatgg<br>ac  |
|                           | 3-hydroxyacyl-[acyl-carrier protein]<br>dehydratase / trans-2-decenoyl-[acyl-<br>carrier protein] isomerase [EC:4.2.1.59;<br>5.3.3.14]                                    | fabA | R | cataaccggatcgccaata<br>a  |
|                           | 3-hydroxyacyl-[acyl-carrier-protein]<br>dehydratase [EC:4.2.1.59]                                                                                                         | fabZ | F | ccgttctactggtggatcg       |
|                           |                                                                                                                                                                           |      | R | ccattgcttcagaatcagc       |
|                           |                                                                                                                                                                           |      | F | gtgcgatgttgcagaaga<br>tg  |
|                           | enoyl-[acyl-carrier protein] reductase I<br>[EC:1.3.1.9; 1.3.1.10]                                                                                                        | fabI | R | gccagggtgcaaaaccaat<br>ag |
|                           |                                                                                                                                                                           |      | F | aggcacggtagtcaatttc<br>g  |
|                           | long-chain-fatty-acid--CoA ligase<br>long-chain acyl-CoA synthetase<br>[EC:6.2.1.3]                                                                                       | fadD | R | gggtttgacgtactgcatc<br>c  |
|                           |                                                                                                                                                                           |      | F | cgctgattacctacggcatt      |
|                           | acyl-CoA dehydrogenase [EC:1.3.99.-]                                                                                                                                      | fadE | R | ccggtaatatccatcgcat<br>c  |
|                           |                                                                                                                                                                           |      | F | atcgtagccagcaaaatg<br>g   |
|                           | putative 2,3-dehydroadipyl-CoA hydratase<br>enoyl-CoA hydratase [EC:4.2.1.17]                                                                                             | paaF | R | tgccagctgtaaggcgatat<br>t |
|                           | 3-hydroxyacyl-CoA dehydrogenase FadJ<br>3-hydroxyacyl-CoA dehydrogenase /<br>enoyl-CoA hydratase / 3-hydroxybutyryl-<br>CoA epimerase [EC:1.1.1.35; 4.2.1.17;<br>5.1.2.3] | fadJ | F | tctgataggcgtagcacac<br>g  |
|                           |                                                                                                                                                                           |      | R | agaatggagtgccgaac<br>aac  |
|                           | 3-hydroxyacyl-CoA dehydrogenase /<br>enoyl-CoA hydratase /                                                                                                                |      | F | tctggaggaaggcattatc<br>g  |
|                           | 3-hydroxybutyryl-CoA epimerase / enoyl-<br>CoA isomerase [EC:1.1.1.35; 4.2.1.17;<br>5.1.2.3; 5.3.3.8]                                                                     | fadB | R | tcgaggatatttgcgctacc      |
|                           | 3-ketoacyl-CoA thiolase FadI<br>acetyl-CoA acyltransferase [EC:2.3.1.16]                                                                                                  | fadI | F | cttaatgccgtaccacctg       |
|                           |                                                                                                                                                                           |      | R | taggttttcgccatttgctc      |
|                           | 3-ketoacyl-CoA thiolase<br>acetyl-CoA acyltransferase [EC:2.3.1.16]                                                                                                       | fadA | F | gtcattgtcgatgcaattcg      |
|                           |                                                                                                                                                                           |      | R | cgcattaaatgagcggag<br>ag  |
|                           |                                                                                                                                                                           |      | F | atcgcttggagacggac<br>ag   |
|                           | acetyl-CoA acetyltransferase<br>acetyl-CoA C-acetyltransferase [EC:2.3.1.9]                                                                                               | atoB | R | aatgtagcgccagttcatc<br>c  |
|                           | putative acyltransferase<br>acetyl-CoA C-acetyltransferase [EC:2.3.1.9]                                                                                                   | yqeF | F | tcagttgcaggatgcttac<br>g  |
|                           |                                                                                                                                                                           |      | R | aacgtctgcccgttactttg      |
|                           | fused 2-acylglycerophospho-ethanolamine<br>acyltransferase/acyl-acyl carrier protein                                                                                      | aas  | F | aaaacgattgccgacttca<br>c  |



|                         |                                                                                                                                                                                        |      |   |                           |
|-------------------------|----------------------------------------------------------------------------------------------------------------------------------------------------------------------------------------|------|---|---------------------------|
| Glycerolipid metabolism | synthetase<br>acyl-[acyl-carrier-protein]-phospholipid<br>O-acyltransferase / long-chain-fatty-acid--<br>[acyl-carrier-protein] ligase [EC:2.3.1.40<br>6.2.1.20]                       |      | R | tctgcacctgtaagcagtg<br>g  |
|                         | putative 3-phenylpropionate/cinnamate<br>dioxygenase ferredoxin reductase subunit<br>3-phenylpropionate/trans-cinnamate<br>dioxygenase ferredoxin reductase<br>component [EC:1.18.1.3] | hcaD | F | atgaacgacctccactctc<br>g  |
|                         |                                                                                                                                                                                        |      | R | ttacaccggaatgcagatg<br>a  |
|                         | glycerate 2-kinase 2<br>glycerate 2-kinase [EC:2.7.1.165]                                                                                                                              | glxK | F | ggcgaattgccatattgaa<br>g  |
|                         |                                                                                                                                                                                        |      | R | taattttgcagccctgttc<br>.  |
|                         | glycerate 2-kinase 1<br>glycerate 2-kinase [EC:2.7.1.165]                                                                                                                              | garK | F | gaagggtaccgattgggtgc<br>g |
|                         |                                                                                                                                                                                        |      | R | tgctggtaataacgctgaa<br>g  |
|                         | aldehyde reductase, NADPH-dependent<br>alcohol dehydrogenase (NADP+)<br>[EC:1.1.1.2]                                                                                                   | yahK | F | agccgttggtgatcaggta<br>g  |
|                         |                                                                                                                                                                                        |      | R | accggtcttcacactcttcg<br>. |
|                         | dihydroxyacetone kinase subunit M<br>phosphoenolpyruvate---glycerone<br>phosphotransferase subunit DhaM<br>[EC:2.7.1.121]                                                              | dhaM | F | cggtagcaggcaaatcaaa<br>cc |
|                         |                                                                                                                                                                                        |      | R | ggcttctgctttcgctgtta<br>. |
|                         | L-1,2-propanediol dehydrogenase/glycerol<br>dehydrogenase<br>glycerol dehydrogenase [EC:1.1.1.6]                                                                                       | gldA | F | aaatgagatcgaccgtctg<br>c  |
|                         |                                                                                                                                                                                        |      | R | taccggaacacccatgaa<br>at  |
|                         | glycerol kinase [EC:2.7.1.30]                                                                                                                                                          | glpK | F | ttgctgtttggtacggttga<br>. |
|                         |                                                                                                                                                                                        |      | R | agcattttgtcgtcccagtc<br>. |
|                         | putative phosphate acyltransferase<br>phosphate acyltransferase [EC:2.3.1.274]                                                                                                         | plsX | F | tttgccattatgggctcagt<br>. |
|                         |                                                                                                                                                                                        |      | R | tccgaatactgtcgagac<br>c   |
|                         | putative glycerol-3-phosphate<br>acyltransferase<br>acyl phosphate:glycerol-3-phosphate<br>acyltransferase [EC:2.3.1.275]                                                              | plsY | F | gttacgtatcggtggcaag<br>g  |
|                         |                                                                                                                                                                                        |      | R | cagaaggggctgacacct<br>aa  |
|                         | glycerol-3-phosphate 1-O-acyltransferase<br>glycerol-3-phosphate O-acyltransferase<br>[EC:2.3.1.15]                                                                                    | plsB | F | tactgcgctactggcatca<br>c  |
|                         |                                                                                                                                                                                        |      | R | tggtgaaggaacggtag<br>ag   |
|                         | 1-acylglycerol-3-phosphate O-<br>acyltransferase PlsC<br>1-acyl-sn-glycerol-3-phosphate<br>acyltransferase [EC:2.3.1.51]                                                               | plsC | F | tggtgacagcatcgaacat<br>c  |
|                         |                                                                                                                                                                                        |      | R | accagtacaactgcccga<br>ag  |
|                         | diacylglycerol kinase (ATP) [EC:2.7.1.107]                                                                                                                                             | dgkA | F | tcaaagctgctggctattcc<br>. |
|                         |                                                                                                                                                                                        |      | R | atgaccaccgccaacaata<br>c  |
|                         | alpha-galactosidase [EC:3.2.1.22]                                                                                                                                                      | melA | F | cgcatatttggtgctgtaa<br>g  |
|                         |                                                                                                                                                                                        |      | R | tcaccgtgcaagggtcata<br>a  |

|                   |                                                 |      |   |                          |
|-------------------|-------------------------------------------------|------|---|--------------------------|
| Housekeeping gene | 16S ribosomal RNA                               | rrsA | F | attgacgttaccgcagaa<br>g  |
|                   |                                                 |      | R | attccgattaacgcttgac      |
|                   | integration host factor subunit beta            | ihfB | F | tttcggcagtttctcttgc      |
|                   |                                                 |      | R | atcgcgagttctttaccag      |
|                   | uroporphyrin-III C-methyltransferase            | cysG | F | gtttatTTTTggccgtggtg     |
|                   |                                                 |      | R | gatgcgtgagtggaatac<br>cc |
|                   | MFS transporter                                 | hcaT | F | ctgatgctggtgatgattg<br>g |
|                   |                                                 |      | R | agtcgcactttgccgtaatc     |
|                   | L-idonate/5-ketogluconate/gluconate transporter | idnT | F | aagtgggttttgcctgctg      |
|                   |                                                 |      | R | acagagagcgctgctacc<br>at |
|                   | outer membrane protein A                        | ompA | F | tgagtacgcgatcactcct<br>g |
|                   |                                                 |      | R | ctgaccgaaacggtagga<br>aa |
|                   | RNA polymerase, sigma 70 (sigma D) factor       | rpoD | F | ttcgtacgcaagaacgtct<br>g |
|                   |                                                 |      | R | aggtatcgctggtttcgttg     |
